# Supplementary material for: In situ conversion of a Ru metathesis catalyst to an isomerization catalystElectronic supplementary information (ESI) available: representative experimental procedure and analytical data for products 3. See http://www.rsc.org/suppdata/cc/b4/b400229f/
Source: Royal Society of Chemistry journal article supplement (doi:10.1039/b400229f), 2004-01-01
Supplement: b400229f.doc [file b400229f.doc]

In-situ conversion of Ru-carbene to Ru-hydride catalysts: Application to the metathesis-isomerization sequence

Bernd Schmidt

Universitaet Dortmund, Fachbereich Chemie – Organische Chemie, Otto-Hahn-Strasse 6, D-44227 Dortmund, Germany. Fax: +49(231)7555363; Tel: +49(231)7553850; E-mail: bschmidt@chemie.uni-dortmund.de

Electronic supplementary information

0. General

Toluene was distilled from sodium under an atmosphere of argon and stored under argon. HPLC-grade 2-propanol was used without further purification. [Cl2(PCy3)2Ru=CHPh] was purchased from Aldrich and used without further purification. NaOH was used as pellets.

All 1H-NMR spectra were obtained at 500 MHz with C6D5H as internal standard (** 7.18). 13C-NMR spectra were obtained at 125 MHz with C6D6 (** 128.0 ppm) as internal standard. 31P-NMR spectra were recorded at 81 MHz directly from the reaction mixture, using a lock capillary filled with C6D6. These samples need to be prepared under an argon atmosphere.

1. Representative procedure for the synthesis of 2,3-dihydropyrans **3**. Synthesis of **3a**.

To a solution of **1a** (354 mg, 1.9 mmol) in dry toluene (8 mL) was added Cl2(PCy3)2Ru=CHPh (78 mg, 5 mol%) under an atmosphere of dry argon. The solution was stirred at ambient temperature under argon until the starting material was completely consumed, as indicated by TLC (silica; hexanes/ether 20:1 (v/v)). 2-Propanol (2 mL) was added, followed by solid NaOH (40 mg, 1.0 mmol). The mixture was heated to reflux until the primarily formed metathesis product was completely consumed (TLC: silica; hexanes/ether 20:1). The isomerization products **3** can be clearly distinguished from the RCM products **2** by staining the TLC plate with iodine. After the isomerization is completed (ca. 2 hours), the reaction mixture is cooled to ambient temperature, diluted with ether (20 mL) and washed with brine. The organic layer is separated, dried with MgSO4, filtered and evaporated. The brown residue is purified by flash chromatography on silica. To obtain analytically pure material, subsequent Kugelrohr distillation is necessary (p = 0.05 mbar, T(oven) = 70°C). Yield of **1a**: 250 mg (82%).

2 1H-NMR-spectroscopical data of compounds **3**:

Signal assignment refers to the following numbering system:

Analytical data for **3c** have been reported in ref. 5b.

| **3** | ** (H2)  (m; J/Hz) | ** (H5)  (m; J/Hz) | ** (H6)  (m; J/Hz) | Other  ** (m, Integral, *J*/Hz, Assignment) |
| --- | --- | --- | --- | --- |
| **3a** | 4.70  (dd, 8.0, 4.5) | 4.64  (m) | 6.57  (d, 5.8) | 7.29 (d, 2H, 7.3, Ph); 7.19 (dd, 2H, 7.3, 7.3, Ph); 7.11 (t, 1H, 7.3, Ph); 1.94 (m, 1H, H4); 1.80-1.70 (3H, H3, H3', H4') |
| **3b** | 4.76  (dd, 10.2, 2.2) | 4.56  (m) | 6.43  (d, 6.2) | 7.10 (d, 1H, 0.8, Fur); 6.18 (d, 1H, 3.0, Fur); 6.09 (dd, 1H 3.0, 0.8, Fur); 2.00 (m, 1H, H3 or H4); 1.87-1.70 (3H, H3, H4) |
| **3d** | 3.67  (m) | 4.61  (m) | 6.49  (d, 6.3) | 1.92 (dm, 1H, 17.2, H4); 1.79 (dm, 1H, 17.2, H4'); 1.68-1.16 (10H, ‑CH2‑, H3, H3'); 0.89 (t, 3H, 7.2, ‑CH3) |
| **3e** | 4.63  (m) | 4.34  (m) | 6.52  (d, 6.2) | 7.25 (d, 2H, 7.5, Ph); 7.13 (dd, 2H, 7.5, 7.5, Ph); 7.06 (t, 1H, 7.5, Ph); 6.62 (d, 1H, 16.0, ‑HC=C*H*Ph); 6.19 (d, 1H, 16.0, 5.7, ‑*H*C=CHPh); 1.89, 1.78, 1.61, 1.60 (m, 1H, H3, H3', H4, H4') |
| **3f*** | 4.37  (s) | 4.54  (ddd, 5.9, 4.8, 2.6) | 6.44  (d, 5.9) | 7.39 (d, 2H, 7.5, Ph); 7.21-7.10 (3H, Ph); 1.90 (dm, 1H, 17.2, H4); 1.82 (dd, 1H, 17.2, 4.8, H4'); 1.18 (dq, 1H, 13.9, 7.3, ‑CH*H*CH3); 1.00 (dq, 1H, 13.9, 7.3, ‑CH*H*CH3); 0.75 (t, 3H, 7.3, ‑CHHC*H*3) |

* NMR-data were obtained from a 4:1 mixture of diastereomers. Only the data for the major diastereomer are reported.

3 13C-NMR-spectroscopical data of compounds **3**:

| **3** | ** (C2) | ** (C5) | ** (C6) | Other: ** (number of coupled protons in parantheses) |
| --- | --- | --- | --- | --- |
| **3a** | 76.8 | 100.2 | 144.3 | 142.2 (0), 128.2, 127.3, 125.8 (1), 30.4, 20.2 (2) |
| **3b** | 70.6 | 100.4 | 144.0 | 154.9 (0), 142.1, 110.4, 106.8 (1), 26.6, 19.7 (2) |
| **3d** | 75.3 | 100.3 | 144.1 | 137.3 (0), 130.7, 129.6, 128.8, 127.8, 126.8 (1), 28.6, 19.7 (2) |
| **3e** | 75.1 | 100.0 | 144.5 | 35.7, 32.2, 28.2, 25.4, 23.0, 20.3 (0), 14.2 (3) |
| **3f*** | 83.3 | 98.8 | 144.1 | 137.6 (0), 128.9, 128.2, 128.0 (1), 69.7 (0, C3), 32.6 (2, C4), 30.6 (2), 6.7 (3) |

* NMR-data were obtained from a 4:1 mixture of diastereomers. Only the data for the major diastereomer are reported.
